# Supplementary material
Source: PubMed Central journal article supplement (PMC6881816)
Supplement: AEM.01804-19-s0001.pdf [file AEM.01804-19-s0001.pdf]

**Supplemental Materials: A global comparison of the bacterial communities of bilge water, boat surfaces and external port water**

Laura G. Schaerer<sup>1</sup>, Ryan B. Ghannam,<sup>1</sup> Timothy M. Butler<sup>1</sup>, Stephen M. Techtmann<sup>1\*</sup>

<sup>1</sup>Department of Biological Sciences, Michigan Technological University, Houghton MI

Keywords: Microbial community composition, bilge water, vessels, port water microbes.

\*Corresponding Author: Stephen M. Techtmann  
740 Dow ESE building  
1400 Townsend Drive  
Houghton, MI, 49931  
(906) 487-3250  
smtechtm@mtu.edu

Table S1: Description of the samples collected for each site.

| <b>Location</b>              | <b>Engine Type</b> | <b>Number Port Water Samples (pre-filter)</b> | <b>Number Port Water Samples (post-filter)</b> | <b>Number Bilge Samples (pre-filter)</b> | <b>Number Bilge Samples (post-filter)</b> | <b>Number Swab Samples</b> |
|------------------------------|--------------------|-----------------------------------------------|------------------------------------------------|------------------------------------------|-------------------------------------------|----------------------------|
| Baltimore, MD, U.S.A.        | <i>Outboard</i>    | 30                                            | 30                                             | 0                                        | 0                                         | 7                          |
| Busan, South Korea           | <i>Inboard</i>     | 32                                            | 31                                             | 1                                        | 0                                         | 5                          |
| Charleston, SC, U.S.A.       | <i>Outboard</i>    | 31                                            | 31                                             | 1                                        | 1                                         | 9                          |
| Duluth Fall, MN, U.S.A.      | <i>Outboard</i>    | 0                                             | 32                                             | 0                                        | 1                                         | 0                          |
| Duluth Summer, MN, U.S.A.    | <i>Outboard</i>    | 31                                            | 30                                             | 1                                        | 1                                         | 4                          |
| Galveston, TX, U.S.A.        | <i>Outboard</i>    | 26                                            | 27                                             | 0                                        | 0                                         | 7                          |
| Green Bay Fall, WI, U.S.A.   | <i>Outboard</i>    | 0                                             | 35                                             | 0                                        | 1                                         | 0                          |
| Green Bay Summer, WI, U.S.A. | <i>Outboard</i>    | 32                                            | 32                                             | 1                                        | 1                                         | 4                          |
| Hong Kong                    | <i>Inboard</i>     | 34                                            | 33                                             | 0                                        | 0                                         | 6                          |
| Keweenaw Summer, MI, U.S.A.  | <i>Outboard</i>    | 38                                            | 37                                             | 2                                        | 1                                         | 5                          |
| Keweenaw Fall, MI, U.S.A.    | <i>Outboard</i>    | 0                                             | 36                                             | 0                                        | 0                                         | 0                          |
| Los Angeles, CA, U.S.A.      | <i>Outboard</i>    | 31                                            | 33                                             | 1                                        | 1                                         | 5                          |
| Martigues, France            | <i>Inboard</i>     | 31                                            | 31                                             | 1                                        | 1                                         | 4                          |
|                              |                    |                                               |                                                |                                          |                                           |                            |

|                            |                 |    |    |   |   |    |
|----------------------------|-----------------|----|----|---|---|----|
| Naples, Italy              | <i>Inboard</i>  | 28 | 29 | 1 | 1 | 6  |
| New Orleans, LA,<br>U.S.A. | <i>Outboard</i> | 31 | 31 | 1 | 1 | 4  |
| New York, NY,<br>U.S.A.    | <i>Outboard</i> | 32 | 32 | 2 | 0 | 6  |
| Norfolk, VA,<br>U.S.A.     | <i>Inboard</i>  | 30 | 30 | 0 | 0 | 8  |
| Oakland, CA,<br>U.S.A.     | <i>Outboard</i> | 29 | 29 | 1 | 1 | 5  |
| Rotterdam,<br>Netherlands  | <i>Outboard</i> | 31 | 32 | 2 | 2 | 7  |
| Seattle, WA,<br>U.S.A.     | <i>Inboard</i>  | 30 | 30 | 3 | 0 | 5  |
| Singapore                  | <i>Inboard</i>  | 32 | 33 | 2 | 2 | 10 |
| Venice, Italy              | <i>Inboard</i>  | 28 | 28 | 1 | 1 | 8  |
| Wilhelmshaven,<br>Germany  | <i>Inboard</i>  | 32 | 29 | 0 | 0 | 6  |

Table S2: One-way ANOVA indicating significant difference between bacterial diversity of sample types for both alpha diversity measures (Shannon and Observed ASVs), demonstrating that the bacterial community on the boat is significantly different than the bacterial community of the port water.

| <b>Indices</b> | <b>Degrees of Freedom</b> | <b>F Value</b> | <b>P Value</b> |
|----------------|---------------------------|----------------|----------------|
| Observed       | 3                         | 16.68          | 9.48e-11       |
| Shannon        | 3                         | 34.96          | <2e-16         |

Table S3: Summary of Tukey HSD (post hoc) test results. P-values for Observed ASVs (upper triangle) and Shannon diversity (lower triangle). These results show a statistically significant difference between each of the sample types for both alpha diversity metrics used. This suggests that the bacterial community in each of our sample types is unique and distinct from the other sample types.

|                   | <b>Port Water</b> | <b>Bilge</b> | <b>Swab</b> |
|-------------------|-------------------|--------------|-------------|
| <b>Port Water</b> |                   | <0.0001      | 0.0193      |
| <b>Bilge</b>      | <0.0001           |              | 0.0003      |
| <b>Swab</b>       | <0.0001           | 0.0023       |             |

Table S4 PERMANOVA of sample types shows a statistically significant difference between each pairwise comparison of the sample types. Upper triangle shows p-values, lower triangle describes R<sup>2</sup> values

|            | Port Water | Bilge | Swab  |
|------------|------------|-------|-------|
| Port Water |            | 0.001 | 0.001 |
| Bilge      | 0.004      |       | 0.001 |
| Swab       | 0.008      | 0.021 |       |

Table S5 Analysis with DESeq2 shows the enrichment of specific ASVs in swab samples vs. port water samples. This comparison showed 51 ASVs significantly enriched in the port water and 8 ASVs enriched in the swab samples relative to the port water.

| <b>Swab Enriched</b>       |         |                |                     |                   |                        |                      |
|----------------------------|---------|----------------|---------------------|-------------------|------------------------|----------------------|
| log2FoldChange             | padj    | Phylum         | Class               | Order             | Family                 | Genus                |
| 4.68289                    | 0.00094 | Proteobacteria | Gammaproteobacteria | Pseudomonadales   | Pseudomonadaceae       | Pseudomonas          |
| 4.63883                    | 0.00228 | Proteobacteria | Gammaproteobacteria | Pseudomonadales   | Pseudomonadaceae       | Pseudomonas          |
| 4.5304                     | 0.00382 | Proteobacteria | Gammaproteobacteria | Pseudomonadales   | Pseudomonadaceae       | Pseudomonas          |
| 3.15627                    | 0.00401 | Actinobacteria | Actinobacteria      | Frankiales        | Sporichthyaceae        | hgcl_clade           |
| 3.08828                    | 0.00054 | Proteobacteria | Gammaproteobacteria | Alteromonadales   | Pseudoalteromonadaceae | Pseudoalteromonas    |
| 2.97634                    | 0.00005 | Proteobacteria | Gammaproteobacteria | Alteromonadales   | Pseudoalteromonadaceae | Pseudoalteromonas    |
| 2.4389                     | 0.00174 | Proteobacteria | Gammaproteobacteria | Alteromonadales   | Pseudoalteromonadaceae | Pseudoalteromonas    |
| 2.30479                    | 0.0007  | Proteobacteria | Gammaproteobacteria | Alteromonadales   | Pseudoalteromonadaceae | Pseudoalteromonas    |
| <b>Open Water Enriched</b> |         |                |                     |                   |                        |                      |
| log2FoldChange             | padj    | Phylum         | Class               | Order             | Family                 | Genus                |
| -3.81304                   | 0.00008 | Proteobacteria | Gammaproteobacteria | Oceanospirillales | Nitrincolaceae         | Marinobacterium      |
| -3.25788                   | 0       | Bacteroidetes  | Bacteroidia         | Flavobacteriales  | Cryomorphaceae         | NA                   |
| -3.17197                   | 0.0007  | Cyanobacteria  | Oxyphotobacteria    | Synechococcales   | Cyanobiaceae           | Synechococcus_CC9902 |
| -3.16064                   | 0.00049 | Proteobacteria | Gammaproteobacteria | Oceanospirillales | Nitrincolaceae         | Marinobacterium      |

|          |         |                |                     |                       |                    |                         |
|----------|---------|----------------|---------------------|-----------------------|--------------------|-------------------------|
| -3.14717 | 0       | Bacteroidetes  | Bacteroidia         | Flavobacteriales      | Flavobacteriaceae  | NS3a_marine_group       |
| -3.07668 | 0       | Bacteroidetes  | Bacteroidia         | Flavobacteriales      | Cryomorphaceae     | NA                      |
| -3.01977 | 0.00039 | Proteobacteria | Gammaproteobacteria | Betaproteobacteriales | Burkholderiaceae   | RS62_marine_group       |
| -2.98304 | 0       | Actinobacteria | Actinobacteria      | Frankiales            | Sporichthyaceae    | Candidatus_Planktophila |
| -2.9532  | 0.00011 | Proteobacteria | Gammaproteobacteria | Betaproteobacteriales | Burkholderiaceae   | RS62_marine_group       |
| -2.89006 | 0       | Actinobacteria | Actinobacteria      | Frankiales            | Sporichthyaceae    | Candidatus_Planktophila |
| -2.78538 | 0.00001 | Cyanobacteria  | Oxyphotobacteria    | Synechococcales       | Cyanobiaceae       | Cyanobium_PCC-6307      |
| -2.76347 | 0.00003 | Bacteroidetes  | Bacteroidia         | Flavobacteriales      | Cryomorphaceae     | NA                      |
| -2.68748 | 0.00024 | Bacteroidetes  | Bacteroidia         | Flavobacteriales      | Flavobacteriaceae  | NS3a_marine_group       |
| -2.65892 | 0       | Bacteroidetes  | Bacteroidia         | Flavobacteriales      | Cryomorphaceae     | NA                      |
| -2.61737 | 0.00014 | Bacteroidetes  | Bacteroidia         | Flavobacteriales      | Flavobacteriaceae  | NS3a_marine_group       |
| -2.60301 | 0.00448 | Cyanobacteria  | Oxyphotobacteria    | Chloroplast           | NA                 | NA                      |
| -2.57742 | 0.00263 | Cyanobacteria  | Oxyphotobacteria    | Chloroplast           | NA                 | NA                      |
| -2.53177 | 0.0007  | Bacteroidetes  | Bacteroidia         | Chitinophagales       | Chitinophagaceae   | Sediminibacterium       |
| -2.50445 | 0       | Proteobacteria | Alphaproteobacteria | Rhodobacterales       | Rhodobacteraceae   | Planktomarina           |
| -2.49813 | 0.00449 | Proteobacteria | Gammaproteobacteria | Betaproteobacteriales | Burkholderiaceae   | RS62_marine_group       |
| -2.49532 | 0.00577 | Bacteroidetes  | Bacteroidia         | Flavobacteriales      | Flavobacteriaceae  | NA                      |
| -2.49403 | 0.00104 | Actinobacteria | Acidimicrobiia      | Microtrichales        | Ilumatobacteraceae | NA                      |

|          |         |                |                     |                       |                     |                             |
|----------|---------|----------------|---------------------|-----------------------|---------------------|-----------------------------|
| -2.46164 | 0.00967 | Cyanobacteria  | Oxyphotobacteria    | Chloroplast           | NA                  | NA                          |
| -2.42637 | 0.00005 | Proteobacteria | Gammaproteobacteria | Oceanospirillales     | Pseudohongiellaceae | Pseudohongiella             |
| -2.42422 | 0.00011 | Proteobacteria | Gammaproteobacteria | Oceanospirillales     | Litoricolaceae      | Litoricola                  |
| -2.40735 | 0.0063  | Cyanobacteria  | Oxyphotobacteria    | Chloroplast           | NA                  | NA                          |
| -2.37089 | 0.00007 | Proteobacteria | Alphaproteobacteria | Puniceispirillales    | SAR116_clade        | Candidatus_Puniceispirillum |
| -2.36697 | 0.00263 | Bacteroidetes  | Bacteroidia         | Flavobacteriales      | Flavobacteriaceae   | Aurantivirga                |
| -2.34931 | 0.00013 | Cyanobacteria  | Oxyphotobacteria    | Synechococcales       | Cyanobiaceae        | Cyanobium_PCC-6307          |
| -2.32545 | 0.00095 | Bacteroidetes  | Bacteroidia         | Flavobacteriales      | Cryomorphaceae      | NA                          |
| -2.31621 | 0.00008 | Proteobacteria | Alphaproteobacteria | Rhodobacterales       | Rhodobacteraceae    | Ascidiaceihabitans          |
| -2.30551 | 0.004   | Proteobacteria | Alphaproteobacteria | Rhodobacterales       | Rhodobacteraceae    | HIMB11                      |
| -2.29235 | 0.00171 | Proteobacteria | Alphaproteobacteria | Rhodobacterales       | Rhodobacteraceae    | Amylibacter                 |
| -2.29012 | 0.00054 | Proteobacteria | Alphaproteobacteria | Rhodobacterales       | Rhodobacteraceae    | Amylibacter                 |
| -2.26492 | 0.00059 | Actinobacteria | Actinobacteria      | Frankiales            | Sporichthyaceae     | Candidatus_Planktophila     |
| -2.22698 | 0.00852 | Bacteroidetes  | Bacteroidia         | Cytophagales          | Spirosomaceae       | Pseudarcicella              |
| -2.22175 | 0.00027 | Proteobacteria | Alphaproteobacteria | SAR11_clade           | Clade_I             | Clade_Ia                    |
| -2.2198  | 0.007   | Proteobacteria | Gammaproteobacteria | Betaproteobacteriales | Methylophilaceae    | Candidatus_Methylopumilus   |
| -2.21209 | 0.00051 | Proteobacteria | Gammaproteobacteria | Betaproteobacteriales | Methylophilaceae    | Candidatus_Methylopumilus   |
| -2.20949 | 0.0006  | Proteobacteria | Alphaproteobacteria | Rhodobacterales       | Rhodobacteraceae    | Amylibacter                 |

|          |         |                |                     |                       |                   |                           |
|----------|---------|----------------|---------------------|-----------------------|-------------------|---------------------------|
| -2.19308 | 0.00113 | Proteobacteria | Gammaproteobacteria | Betaproteobacteriales | Methylophilaceae  | Candidatus_Methylopumilus |
| -2.17369 | 0.00353 | Bacteroidetes  | Bacteroidia         | Flavobacteriales      | Flavobacteriaceae | NS3a_marine_group         |
| -2.1615  | 0.00094 | Cyanobacteria  | Oxyphotobacteria    | Synechococcales       | Cyanobiaceae      | Cyanobium_PCC-6307        |
| -2.14396 | 0.00103 | Proteobacteria | Alphaproteobacteria | SAR11_clade           | Clade_I           | Clade_Ia                  |
| -2.14061 | 0.00277 | Proteobacteria | Alphaproteobacteria | SAR11_clade           | Clade_I           | Clade_Ia                  |
| -2.13133 | 0.00342 | Bacteroidetes  | Bacteroidia         | Chitinophagales       | Chitinophagaceae  | Sediminibacterium         |
| -2.12326 | 0.00001 | Proteobacteria | Alphaproteobacteria | Rhodobacterales       | Rhodobacteraceae  | Planktomarina             |
| -2.11231 | 0.00572 | Bacteroidetes  | Bacteroidia         | Flavobacteriales      | Cryomorphaceae    | NA                        |
| -2.11214 | 0.0001  | Proteobacteria | Alphaproteobacteria | SAR11_clade           | Clade_I           | Clade_Ia                  |
| -2.04224 | 0.00277 | Proteobacteria | Gammaproteobacteria | SAR86_clade           | NA                | NA                        |
| -2.0357  | 0       | Bacteroidetes  | Bacteroidia         | Flavobacteriales      | Cryomorphaceae    | NA                        |



Table S6 DESeq enrichment table for bilge vs. port water comparison. Analysis with DESeq2 showed the enrichment of specific ASVs in swab samples vs. port water samples. This comparison showed 38 ASVs significantly enriched in the port water and no ASVs enriched in the bilge samples relative to the port water.

| <b>Open Water Enriched</b> |         |                |                     |                  |                  |                    |
|----------------------------|---------|----------------|---------------------|------------------|------------------|--------------------|
| log2FoldChange             | padj    | Phylum         | Class               | Order            | Family           | Genus              |
| -5.50948                   | 0       | Cyanobacteria  | Oxyphotobacteria    | Synechococcales  | Cyanobiaceae     | Cyanobium_PCC-6307 |
| -5.11399                   | 0.00001 | Cyanobacteria  | Oxyphotobacteria    | Synechococcales  | Cyanobiaceae     | Cyanobium_PCC-6307 |
| -4.77234                   | 0.00004 | Cyanobacteria  | Oxyphotobacteria    | Chloroplast      | NA               | NA                 |
| -4.56999                   | 0       | Bacteroidetes  | Bacteroidia         | Flavobacteriales | Cryomorphaceae   | NA                 |
| -4.56019                   | 0.00013 | Proteobacteria | Alphaproteobacteria | SAR11_clade      | Clade_I          | Clade_Ia           |
| -4.55037                   | 0       | Proteobacteria | Alphaproteobacteria | Rhodobacterales  | Rhodobacteraceae | Planktomarina      |
| -4.41666                   | 0.0003  | Cyanobacteria  | Oxyphotobacteria    | Chloroplast      | NA               | NA                 |
| -4.3832                    | 0       | Bacteroidetes  | Bacteroidia         | Flavobacteriales | Cryomorphaceae   | NA                 |
| -4.36032                   | 0       | Bacteroidetes  | Bacteroidia         | Flavobacteriales | Cryomorphaceae   | NA                 |
| -4.31001                   | 0       | Proteobacteria | Alphaproteobacteria | Rhodobacterales  | Rhodobacteraceae | Planktomarina      |
| -4.30388                   | 0.00033 | Cyanobacteria  | Oxyphotobacteria    | Chloroplast      | NA               | NA                 |
| -4.25212                   | 0.00076 | Cyanobacteria  | Oxyphotobacteria    | Chloroplast      | NA               | NA                 |
| -4.24254                   | 0.00127 | Proteobacteria | Alphaproteobacteria | SAR11_clade      | Clade_I          | Clade_Ia           |

|          |         |                |                     |                       |                   |                    |
|----------|---------|----------------|---------------------|-----------------------|-------------------|--------------------|
| -4.08377 | 0.00236 | Bacteroidetes  | Bacteroidia         | Flavobacteriales      | Flavobacteriaceae | NS3a_marine_group  |
| -4.03043 | 0.00145 | Cyanobacteria  | Oxyphotobacteria    | Chloroplast           | NA                | NA                 |
| -4.0211  | 0       | Bacteroidetes  | Bacteroidia         | Flavobacteriales      | Cryomorphaceae    | NA                 |
| -4.00375 | 0.009   | Proteobacteria | Gammaproteobacteria | Betaproteobacteriales | Burkholderiaceae  | RS62_marine_group  |
| -3.99199 | 0.0044  | Bacteroidetes  | Bacteroidia         | Flavobacteriales      | Flavobacteriaceae | NS3a_marine_group  |
| -3.95214 | 0.00096 | Proteobacteria | Alphaproteobacteria | Rhodobacterales       | Rhodobacteraceae  | Amylibacter        |
| -3.92089 | 0.00131 | Cyanobacteria  | Oxyphotobacteria    | Chloroplast           | NA                | NA                 |
| -3.9067  | 0.00001 | Proteobacteria | Alphaproteobacteria | Rhodobacterales       | Rhodobacteraceae  | Planktomarina      |
| -3.89526 | 0.00169 | Proteobacteria | Alphaproteobacteria | Rhodobacterales       | Rhodobacteraceae  | Amylibacter        |
| -3.84627 | 0.00013 | Proteobacteria | Alphaproteobacteria | SAR11_clade           | Clade_I           | Clade_Ia           |
| -3.78317 | 0.00025 | Proteobacteria | Alphaproteobacteria | SAR11_clade           | Clade_I           | Clade_Ia           |
| -3.78044 | 0.00554 | Bacteroidetes  | Bacteroidia         | Flavobacteriales      | Flavobacteriaceae | NS3a_marine_group  |
| -3.70614 | 0.00034 | Proteobacteria | Alphaproteobacteria | Rhodobacterales       | Rhodobacteraceae  | Ascidiaceihabitans |
| -3.64932 | 0.00008 | Proteobacteria | Alphaproteobacteria | Rhodobacterales       | Rhodobacteraceae  | Planktomarina      |
| -3.64651 | 0.00486 | Proteobacteria | Gammaproteobacteria | Betaproteobacteriales | Burkholderiaceae  | Limnohabitans      |
| -3.64639 | 0.00236 | Proteobacteria | Alphaproteobacteria | SAR11_clade           | Clade_I           | Clade_Ia           |
| -3.59221 | 0.001   | Proteobacteria | Alphaproteobacteria | SAR11_clade           | Clade_I           | Clade_Ia           |
| -3.48276 | 0.00025 | Proteobacteria | Alphaproteobacteria | SAR11_clade           | Clade_I           | Clade_Ia           |

|          |         |                |                     |                   |                     |                    |
|----------|---------|----------------|---------------------|-------------------|---------------------|--------------------|
| -3.3866  | 0.00486 | Proteobacteria | Alphaproteobacteria | SAR11_clade       | Clade_I             | Clade_Ia           |
| -3.38517 | 0.00358 | Proteobacteria | Gammaproteobacteria | Oceanospirillales | Pseudohongiellaceae | Pseudohongiella    |
| -3.25922 | 0.00997 | Bacteroidetes  | Bacteroidia         | Flavobacteriales  | Flavobacteriaceae   | Formosa            |
| -3.20628 | 0.0067  | Proteobacteria | Alphaproteobacteria | SAR11_clade       | Clade_II            | NA                 |
| -3.16597 | 0.00477 | Proteobacteria | Alphaproteobacteria | SAR11_clade       | Clade_I             | Clade_Ia           |
| -3.13174 | 0.00762 | Proteobacteria | Alphaproteobacteria | Rhodobacterales   | Rhodobacteraceae    | Ascidiaceihabitans |
| -3.06206 | 0.00033 | Proteobacteria | Alphaproteobacteria | SAR11_clade       | Clade_I             | Clade_Ia           |

Table S7: Average abundance of phyla which are higher in the bilge than in the port water in specific locations, demonstrating that there are observable differences between bilge and port water when observing specific taxa in specific locations, despite the fact that analysis with DESeq2 did not show any differentially enriched ASVs in the bilge water.

| <b>Average Abundance of Phyla in Bilge and Open Water</b> |                 |        |            |
|-----------------------------------------------------------|-----------------|--------|------------|
| Phylum                                                    | Location        | Bilge  | Port Water |
| Actinobacteria                                            | Duluth Fall     | 0.063  | 0.0463     |
| Actinobacteria                                            | Green Bay Fall  | 0.0528 | 0.041      |
| Actinobacteria                                            | Keweenaw Summer | 0.1742 | 0.1361     |
| Actinobacteria                                            | Los Angeles     | 0.2086 | 0.104      |
| Actinobacteria                                            | Martigues       | 0.3217 | 0.0592     |
| Actinobacteria                                            | Naples          | 0.1807 | 0.0992     |
| Actinobacteria                                            | Oakland         | 0.2067 | 0.0497     |
| Actinobacteria                                            | Rotterdam       | 0.2473 | 0.1259     |
| Actinobacteria                                            | Seattle         | 0.4704 | 0.0847     |
| Actinobacteria                                            | Singapore       | 0.3483 | 0.2085     |
| Bacteroidetes                                             | Duluth Fall     | 0.3116 | 0.2892     |
| Bacteroidetes                                             | Duluth Summer   | 0.2988 | 0.2777     |
| Bacteroidetes                                             | Green Bay Fall  | 0.2918 | 0.2894     |

|                |             |        |        |
|----------------|-------------|--------|--------|
|                | Green Bay   |        |        |
| Bacteroidetes  | Summer      | 0.2693 | 0.2063 |
| Cyanobacteria  | Busan       | 0.1606 | 0.0639 |
| Cyanobacteria  | Charleston  | 0.1706 | 0.0666 |
| Cyanobacteria  | Duluth Fall | 0.1569 | 0.1025 |
|                | Green Bay   |        |        |
| Cyanobacteria  | Fall        | 0.0968 | 0.0768 |
|                | Keweenaw    |        |        |
| Cyanobacteria  | Summer      | 0.201  | 0.1833 |
| Cyanobacteria  | Los Angeles | 0.1508 | 0.0964 |
| Cyanobacteria  | Martigues   | 0.071  | 0.0592 |
| Cyanobacteria  | Naples      | 0.518  | 0.2173 |
|                | New         |        |        |
| Cyanobacteria  | Orleans     | 0.2685 | 0.183  |
| Cyanobacteria  | New York    | 0.2337 | 0.0762 |
| Cyanobacteria  | Oakland     | 0.1301 | 0.0495 |
| Cyanobacteria  | Rotterdam   | 0.2893 | 0.0703 |
| Cyanobacteria  | Seattle     | 0.1056 | 0.0489 |
| Cyanobacteria  | Singapore   | 0.1802 | 0.0583 |
| Cyanobacteria  | Venice      | 0.3094 | 0.136  |
| Firmicutes     | New York    | 0.0334 | 0.0237 |
|                | Green Bay   |        |        |
| Planctomycetes | Fall        | 0.0367 | 0.0333 |

|                 |             |        |        |
|-----------------|-------------|--------|--------|
|                 | Green Bay   |        |        |
| Planctomycetes  | Summer      | 0.0462 | 0.0389 |
|                 | Keweenaw    |        |        |
| Planctomycetes  | Summer      | 0.0594 | 0.0499 |
| Planctomycetes  | Rotterdam   | 0.0573 | 0.0415 |
| Planctomycetes  | Venice      | 0.069  | 0.0497 |
| Proteobacteria  | Busan       | 0.4753 | 0.4504 |
| Proteobacteria  | Naples      | 0.3726 | 0.3491 |
|                 | New         |        |        |
| Proteobacteria  | Orleans     | 0.3926 | 0.368  |
| Verrucomicrobia | Charleston  | 0.0391 | 0.036  |
|                 | Duluth      |        |        |
| Verrucomicrobia | Summer      | 0.0457 | 0.0403 |
|                 | Keweenaw    |        |        |
| Verrucomicrobia | Summer      | 0.0371 | 0.0303 |
| Verrucomicrobia | Los Angeles | 0.0345 | 0.0293 |
| Verrucomicrobia | New York    | 0.0286 | 0.0278 |

Table S8 Analysis with DESeq2 to look for differentially abundant ASVs between the port water and the boat samples (both bilge and swab samples) showed 9 ASVs enriched in the boat samples relative to 80 ASVs enriched in the port water.

| <b>Boat Enriched</b>       |         |                |                     |                   |                        |                         |
|----------------------------|---------|----------------|---------------------|-------------------|------------------------|-------------------------|
| log2FoldChange             | padj    | Phylum         | Class               | Order             | Family                 | Genus                   |
| 1.67520476                 | 0.00396 | Actinobacteria | Actinobacteria      | Frankiales        | Sporichthyaceae        | Candidatus_Planktophila |
| 2.117216792                | 0.00747 | Proteobacteria | Gammaproteobacteria | Alteromonadales   | Pseudoalteromonadaceae | Pseudoalteromonas       |
| 2.62357256                 | 0.00576 | Actinobacteria | Actinobacteria      | Frankiales        | Sporichthyaceae        | hgcI_clade              |
| 2.679533669                | 0.00002 | Proteobacteria | Gammaproteobacteria | Alteromonadales   | Pseudoalteromonadaceae | Pseudoalteromonas       |
| 2.683503948                | 0.00500 | Actinobacteria | Actinobacteria      | Frankiales        | Sporichthyaceae        | hgcI_clade              |
| 4.232894371                | 0.00065 | Proteobacteria | Gammaproteobacteria | Pseudomonadales   | Pseudomonadaceae       | Pseudomonas             |
| 4.341155472                | 0.00051 | Proteobacteria | Gammaproteobacteria | Pseudomonadales   | Pseudomonadaceae       | Pseudomonas             |
| 4.36116871                 | 0.00021 | Proteobacteria | Gammaproteobacteria | Pseudomonadales   | Pseudomonadaceae       | Pseudomonas             |
| <b>Port Water Enriched</b> |         |                |                     |                   |                        |                         |
| log2FoldChange             | padj    | Phylum         | Class               | Order             | Family                 | Genus                   |
| -3.98589338                | 0.00000 | Proteobacteria | Gammaproteobacteria | Oceanospirillales | Nitrincolaceae         | Marinobacterium         |
| -3.627910891               | 0.00000 | Bacteroidetes  | Bacteroidia         | Flavobacteriales  | Cryomorphaceae         | NA                      |
| -3.476387172               | 0.00000 | Proteobacteria | Gammaproteobacteria | Oceanospirillales | Nitrincolaceae         | Marinobacterium         |
| -3.328127303               | 0.00000 | Bacteroidetes  | Bacteroidia         | Flavobacteriales  | Flavobacteriaceae      | NS3a_marine_group       |
| -3.289391299               | 0.00000 | Bacteroidetes  | Bacteroidia         | Flavobacteriales  | Cryomorphaceae         | NA                      |

|              |         |                |                     |                       |                   |                      |
|--------------|---------|----------------|---------------------|-----------------------|-------------------|----------------------|
| -3.286671052 | 0.00002 | Cyanobacteria  | Oxyphotobacteria    | Synechococcales       | Cyanobiaceae      | Synechococcus_CC9902 |
| -3.212086509 | 0.00000 | Proteobacteria | Gammaproteobacteria | Betaproteobacteriales | Burkholderiaceae  | RS62_marine_group    |
| -3.139714786 | 0.00001 | Proteobacteria | Gammaproteobacteria | Betaproteobacteriales | Burkholderiaceae  | RS62_marine_group    |
| -3.058909444 | 0.00000 | Bacteroidetes  | Bacteroidia         | Flavobacteriales      | Cryomorphaceae    | NA                   |
| -2.98147419  | 0.00289 | Proteobacteria | Gammaproteobacteria | Oceanospirillales     | Nitrincolaceae    | Marinobacterium      |
| -2.946463558 | 0.00584 | Proteobacteria | Gammaproteobacteria | Oceanospirillales     | Nitrincolaceae    | Marinobacterium      |
| -2.837718207 | 0.00000 | Bacteroidetes  | Bacteroidia         | Flavobacteriales      | Flavobacteriaceae | NS3a_marine_group    |
| -2.833624911 | 0.00000 | Cyanobacteria  | Oxyphotobacteria    | Synechococcales       | Cyanobiaceae      | Cyanobium_PCC-6307   |
| -2.818891948 | 0.00006 | Cyanobacteria  | Oxyphotobacteria    | Chloroplast           | NA                | NA                   |
| -2.799045339 | 0.00000 | Proteobacteria | Alphaproteobacteria | Rhodobacterales       | Rhodobacteraceae  | Planktomarina        |
| -2.789886089 | 0.00011 | Cyanobacteria  | Oxyphotobacteria    | Chloroplast           | NA                | NA                   |
| -2.776870598 | 0.00000 | Proteobacteria | Alphaproteobacteria | Rhodobacterales       | Rhodobacteraceae  | Amylibacter          |
| -2.773995812 | 0.00071 | Cyanobacteria  | Oxyphotobacteria    | Synechococcales       | Cyanobiaceae      | Cyanobium_PCC-6307   |
| -2.760196656 | 0.00616 | Cyanobacteria  | Oxyphotobacteria    | Synechococcales       | Cyanobiaceae      | Synechococcus_CC9902 |
| -2.758050187 | 0.00079 | Cyanobacteria  | Oxyphotobacteria    | Synechococcales       | Cyanobiaceae      | Cyanobium_PCC-6307   |
| -2.748600763 | 0.00000 | Bacteroidetes  | Bacteroidia         | Flavobacteriales      | Cryomorphaceae    | NA                   |
| -2.73975402  | 0.00009 | Proteobacteria | Gammaproteobacteria | Betaproteobacteriales | Burkholderiaceae  | RS62_marine_group    |
| -2.73780539  | 0.00000 | Cyanobacteria  | Oxyphotobacteria    | Synechococcales       | Cyanobiaceae      | Cyanobium_PCC-6307   |



|              |         |                |                     |                       |                     |                             |
|--------------|---------|----------------|---------------------|-----------------------|---------------------|-----------------------------|
| -2.7226325   | 0.00019 | Bacteroidetes  | Bacteroidia         | Flavobacteriales      | Flavobacteriaceae   | NA                          |
| -2.607066686 | 0.00000 | Proteobacteria | Alphaproteobacteria | SAR11_clade           | Clade_I             | Clade_Ia                    |
| -2.605000972 | 0.00000 | Proteobacteria | Alphaproteobacteria | Rhodobacterales       | Rhodobacteraceae    | Ascidiaceihabitans          |
| -2.599997519 | 0.00006 | Bacteroidetes  | Bacteroidia         | Flavobacteriales      | Flavobacteriaceae   | Aurantivirga                |
| -2.599334776 | 0.00094 | Proteobacteria | Gammaproteobacteria | Betaproteobacteriales | Burkholderiaceae    | RS62_marine_group           |
| -2.587357232 | 0.00001 | Bacteroidetes  | Bacteroidia         | Flavobacteriales      | Flavobacteriaceae   | NS3a_marine_group           |
| -2.569755334 | 0.00071 | Cyanobacteria  | Oxyphotobacteria    | Chloroplast           | NA                  | NA                          |
| -2.537846414 | 0.00038 | Cyanobacteria  | Oxyphotobacteria    | Chloroplast           | NA                  | NA                          |
| -2.532716002 | 0.00189 | Cyanobacteria  | Oxyphotobacteria    | Synechococcales       | Cyanobiaceae        | Cyanobium_PCC-6307          |
| -2.53239314  | 0.00002 | Proteobacteria | Alphaproteobacteria | Rhodobacterales       | Rhodobacteraceae    | Amylibacter                 |
| -2.489144396 | 0.00000 | Proteobacteria | Gammaproteobacteria | Oceanospirillales     | Litoricolaceae      | Litoricola                  |
| -2.471475622 | 0.00232 | Cyanobacteria  | Oxyphotobacteria    | Synechococcales       | Cyanobiaceae        | Synechococcus_CC9902        |
| -2.451510594 | 0.00000 | Proteobacteria | Alphaproteobacteria | Rhodobacterales       | Rhodobacteraceae    | Amylibacter                 |
| -2.451158591 | 0.00000 | Proteobacteria | Gammaproteobacteria | Oceanospirillales     | Pseudohongiellaceae | Pseudohongiella             |
| -2.448909412 | 0.00000 | Actinobacteria | Actinobacteria      | Frankiales            | Sporichthyaceae     | Candidatus_Planktophila     |
| -2.445319386 | 0.00010 | Actinobacteria | Acidimicrobiia      | Microtrichales        | Ilumatobacteraceae  | NA                          |
| -2.444002731 | 0.00000 | Proteobacteria | Alphaproteobacteria | Puniceispirillales    | SAR116_clade        | Candidatus_Puniceispirillum |
| -2.409252115 | 0.00001 | Cyanobacteria  | Oxyphotobacteria    | Synechococcales       | Cyanobiaceae        | Cyanobium_PCC-6307          |

|              |         |                |                     |                       |                   |                           |
|--------------|---------|----------------|---------------------|-----------------------|-------------------|---------------------------|
| -2.405969499 | 0.00277 | Bacteroidetes  | Bacteroidia         | Flavobacteriales      | Flavobacteriaceae | NA                        |
| -2.400744675 | 0.00002 | Proteobacteria | Gammaproteobacteria | SAR86_clade           | NA                | NA                        |
| -2.390444878 | 0.00000 | Actinobacteria | Actinobacteria      | Frankiales            | Sporichthyaceae   | Candidatus_Planktophila   |
| -2.390359391 | 0.00616 | Cyanobacteria  | Oxyphotobacteria    | Synechococcales       | Cyanobiaceae      | Synechococcus_CC9902      |
| -2.377501827 | 0.00007 | Bacteroidetes  | Bacteroidia         | Flavobacteriales      | Cryomorphaceae    | NA                        |
| -2.371587598 | 0.00274 | Cyanobacteria  | Oxyphotobacteria    | Chloroplast           | NA                | NA                        |
| -2.371114186 | 0.00000 | Proteobacteria | Alphaproteobacteria | SAR11_clade           | Clade_I           | Clade_Ia                  |
| -2.362214954 | 0.00000 | Bacteroidetes  | Bacteroidia         | Flavobacteriales      | Cryomorphaceae    | NA                        |
| -2.361438047 | 0.00012 | Bacteroidetes  | Bacteroidia         | Flavobacteriales      | Flavobacteriaceae | NS3a_marine_group         |
| -2.342636632 | 0.00969 | Actinobacteria | Acidimicrobiia      | Actinomarinales       | Actinomarinaceae  | Candidatus_Actinomarina   |
| -2.333304181 | 0.00175 | Cyanobacteria  | Oxyphotobacteria    | Synechococcales       | Cyanobiaceae      | Synechococcus_CC9902      |
| -2.332531382 | 0.00047 | Proteobacteria | Alphaproteobacteria | SAR11_clade           | Clade_I           | Clade_Ia                  |
| -2.318014782 | 0.00000 | Proteobacteria | Alphaproteobacteria | SAR11_clade           | Clade_I           | Clade_Ia                  |
| -2.298314289 | 0.00005 | Proteobacteria | Gammaproteobacteria | Betaproteobacteriales | Methylophilaceae  | Candidatus_Methylopumilus |
| -2.290601547 | 0.00067 | Proteobacteria | Alphaproteobacteria | Rhodobacterales       | Rhodobacteraceae  | HIMB11                    |
| -2.281251459 | 0.00086 | Cyanobacteria  | Oxyphotobacteria    | Chloroplast           | NA                | NA                        |
| -2.268941967 | 0.00010 | Proteobacteria | Alphaproteobacteria | SAR11_clade           | Clade_I           | Clade_Ia                  |
| -2.262450743 | 0.00000 | Proteobacteria | Alphaproteobacteria | Rhodobacterales       | Rhodobacteraceae  | Planktomarina             |

|              |         |                |                     |                       |                  |                           |
|--------------|---------|----------------|---------------------|-----------------------|------------------|---------------------------|
| -2.202111703 | 0.00008 | Actinobacteria | Actinobacteria      | Frankiales            | Sporichthyaceae  | Candidatus_Planktophila   |
| -2.196913802 | 0.00051 | Bacteroidetes  | Bacteroidia         | Flavobacteriales      | Cryomorphaceae   | NA                        |
| -2.194811609 | 0.00008 | Cyanobacteria  | Oxyphotobacteria    | Synechococcales       | Cyanobiaceae     | Cyanobium_PCC-6307        |
| -2.190878275 | 0.00012 | Proteobacteria | Alphaproteobacteria | SAR11_clade           | Clade_I          | Clade_Ia                  |
| -2.18874064  | 0.00022 | Bacteroidetes  | Bacteroidia         | Chitinophagales       | Chitinophagaceae | Sediminibacterium         |
| -2.175963376 | 0.00515 | Cyanobacteria  | Oxyphotobacteria    | Chloroplast           | NA               | NA                        |
| -2.171666154 | 0.00430 | Cyanobacteria  | Oxyphotobacteria    | Chloroplast           | NA               | NA                        |
| -2.168415656 | 0.00747 | Cyanobacteria  | Oxyphotobacteria    | Chloroplast           | NA               | NA                        |
| -2.163763068 | 0.00232 | Bacteroidetes  | Bacteroidia         | Cytophagales          | Spirosomaceae    | Pseudarcicella            |
| -2.134597222 | 0.00580 | Cyanobacteria  | Oxyphotobacteria    | Synechococcales       | Cyanobiaceae     | Cyanobium_PCC-6307        |
| -2.128474264 | 0.00001 | Proteobacteria | Alphaproteobacteria | Rhodobacterales       | Rhodobacteraceae | Ascidiaceihabitans        |
| -2.127184142 | 0.00512 | Proteobacteria | Gammaproteobacteria | Betaproteobacteriales | Burkholderiaceae | Polynucleobacter          |
| -2.110912092 | 0.00005 | Proteobacteria | Alphaproteobacteria | SAR11_clade           | Clade_I          | Clade_Ia                  |
| -2.101333343 | 0.00221 | Bacteroidetes  | Bacteroidia         | Chitinophagales       | Chitinophagaceae | Sediminibacterium         |
| -2.095513591 | 0.00274 | Proteobacteria | Alphaproteobacteria | Rhodobacterales       | Rhodobacteraceae | HIMB11                    |
| -2.081516765 | 0.00269 | Proteobacteria | Gammaproteobacteria | Betaproteobacteriales | Methylophilaceae | Candidatus_Methylopumilus |
| -2.069929418 | 0.00082 | Actinobacteria | Acidimicrobiia      | Actinomarinales       | Actinomarinaceae | Candidatus_Actinomarina   |
| -2.064307881 | 0.00050 | Proteobacteria | Alphaproteobacteria | SAR11_clade           | Clade_II         | NA                        |

|              |         |                |                     |                   |                     |                         |
|--------------|---------|----------------|---------------------|-------------------|---------------------|-------------------------|
| -2.05662602  | 0.00068 | Bacteroidetes  | Bacteroidia         | Chitinophagales   | Chitinophagaceae    | Sediminibacterium       |
| -2.031945474 | 0.00167 | Proteobacteria | Alphaproteobacteria | Rhodobacterales   | Rhodobacteraceae    | Amylibacter             |
| -2.03101215  | 0.00155 | Bacteroidetes  | Bacteroidia         | Chitinophagales   | Chitinophagaceae    | Sediminibacterium       |
| -2.021819447 | 0.00127 | Proteobacteria | Gammaproteobacteria | Oceanospirillales | Pseudohongiellaceae | Pseudohongiella         |
| -2.010995555 | 0.00179 | Actinobacteria | Actinobacteria      | Micrococcales     | Microbacteriaceae   | Candidatus_Aquiluna     |
| -1.999655128 | 0.00010 | Proteobacteria | Alphaproteobacteria | SAR11_clade       | Clade_II            | NA                      |
| -1.989488314 | 0.00468 | Bacteroidetes  | Bacteroidia         | Flavobacteriales  | Flavobacteriaceae   | Aurantivirga            |
| -1.987216944 | 0.00206 | Bacteroidetes  | Bacteroidia         | Chitinophagales   | Chitinophagaceae    | Sediminibacterium       |
| -1.98591858  | 0.00444 | Bacteroidetes  | Rhodothermia        | Balneolales       | Balneolaceae        | Balneola                |
| -1.985229021 | 0.00093 | Bacteroidetes  | Bacteroidia         | Flavobacteriales  | Cryomorphaceae      | NA                      |
| -1.980786415 | 0.00078 | Proteobacteria | Alphaproteobacteria | Rhodobacterales   | Rhodobacteraceae    | Lentibacter             |
| -1.979641353 | 0.00221 | Proteobacteria | Alphaproteobacteria | SAR11_clade       | Clade_I             | Clade_Ia                |
| -1.925176695 | 0.00000 | Proteobacteria | Alphaproteobacteria | Rhodobacterales   | Rhodobacteraceae    | Planktomarina           |
| -1.925175871 | 0.00047 | Cyanobacteria  | Oxyphotobacteria    | Chloroplast       | NA                  | NA                      |
| -1.922156418 | 0.00000 | Proteobacteria | Alphaproteobacteria | Rhodobacterales   | Rhodobacteraceae    | Planktomarina           |
| -1.913114761 | 0.00236 | Bacteroidetes  | Rhodothermia        | Balneolales       | Balneolaceae        | Balneola                |
| -1.894941702 | 0.00056 | Cyanobacteria  | Oxyphotobacteria    | Chloroplast       | NA                  | NA                      |
| -1.878475279 | 0.00944 | Actinobacteria | Actinobacteria      | Frankiales        | Sporichthyaceae     | Candidatus_Planktophila |

|              |         |                |                     |                   |                    |                         |
|--------------|---------|----------------|---------------------|-------------------|--------------------|-------------------------|
| -1.863681232 | 0.00272 | Bacteroidetes  | Bacteroidia         | Chitinophagales   | Chitinophagaceae   | Sediminibacterium       |
| -1.855329054 | 0.00598 | Proteobacteria | Gammaproteobacteria | Oceanospirillales | Litoricolaceae     | Litoricola              |
| -1.814274145 | 0.00252 | Proteobacteria | Alphaproteobacteria | Rhodobacterales   | Rhodobacteraceae   | Lentibacter             |
| -1.789835045 | 0.00071 | Actinobacteria | Acidimicrobiia      | Microtrichales    | Ilumatobacteraceae | CL500-29_marine_group   |
| -1.776904839 | 0.00657 | Bacteroidetes  | Bacteroidia         | Flavobacteriales  | Cryomorphaceae     | NA                      |
| -1.761137284 | 0.00254 | Cyanobacteria  | Oxyphotobacteria    | Chloroplast       | NA                 | NA                      |
| -1.754477522 | 0.00616 | Actinobacteria | Actinobacteria      | Frankiales        | Sporichthyaceae    | Candidatus_Planktophila |
| -1.752372401 | 0.00036 | Proteobacteria | Alphaproteobacteria | SAR11_clade       | Clade_I            | Clade_Ia                |
| -1.748942271 | 0.00304 | Cyanobacteria  | Oxyphotobacteria    | Chloroplast       | NA                 | NA                      |
| -1.742101367 | 0.00684 | Bacteroidetes  | Bacteroidia         | Cytophagales      | Spirosomaceae      | Pseudarcicella          |
| -1.712721509 | 0.00045 | Proteobacteria | Alphaproteobacteria | SAR11_clade       | Clade_I            | Clade_Ia                |
| -1.695787039 | 0.00400 | Actinobacteria | Actinobacteria      | Micrococcales     | Microbacteriaceae  | NA                      |
| -1.694730648 | 0.00950 | Proteobacteria | Alphaproteobacteria | Rhodobacterales   | Rhodobacteraceae   | HIMB11                  |
| -1.676561497 | 0.00228 | Cyanobacteria  | Oxyphotobacteria    | Chloroplast       | NA                 | NA                      |
| -1.672902705 | 0.00013 | Proteobacteria | Alphaproteobacteria | SAR11_clade       | Clade_I            | Clade_Ia                |
| -1.667759442 | 0.00903 | Bacteroidetes  | Bacteroidia         | Flavobacteriales  | Flavobacteriaceae  | Formosa                 |
| -1.655813676 | 0.00870 | Proteobacteria | Alphaproteobacteria | Rhodobacterales   | Rhodobacteraceae   | Ascidiaceihabitans      |
| -1.633442022 | 0.00585 | Cyanobacteria  | Oxyphotobacteria    | Chloroplast       | NA                 | NA                      |

|              |         |                |                     |                       |                    |                       |
|--------------|---------|----------------|---------------------|-----------------------|--------------------|-----------------------|
| -1.56077625  | 0.00616 | Bacteroidetes  | Bacteroidia         | Flavobacteriales      | Flavobacteriaceae  | Formosa               |
| -1.55968514  | 0.00023 | Proteobacteria | Alphaproteobacteria | SAR11_clade           | Clade_I            | Clade_Ia              |
| -1.53354049  | 0.00005 | Proteobacteria | Alphaproteobacteria | SAR11_clade           | Clade_I            | Clade_Ia              |
| -1.482313163 | 0.00576 | Proteobacteria | Gammaproteobacteria | Betaproteobacteriales | Burkholderiaceae   | Limnohabitans         |
| -1.423779936 | 0.00537 | Actinobacteria | Acidimicrobiia      | Microtrichales        | Ilumatobacteraceae | CL500-29_marine_group |

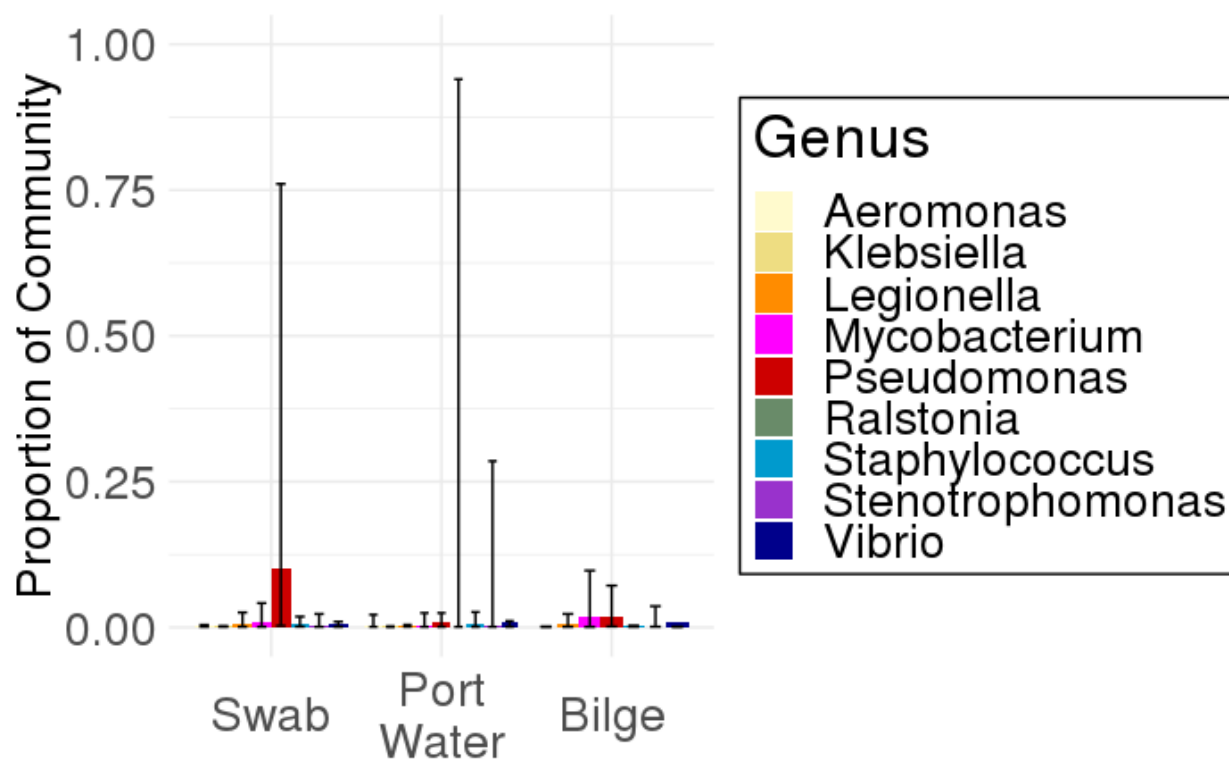

Figure S1 Average abundance of genera associated with pathogens is highly variable across each sample type. Port water samples had ten genera frequently associated with pathogens while swab and bilge samples represented seven and eight genera, respectively. Swab and bilge samples had a higher percentage of reads from genera associated with pathogens (13.4% and 6.0%, respectively) than port water (4.4%).

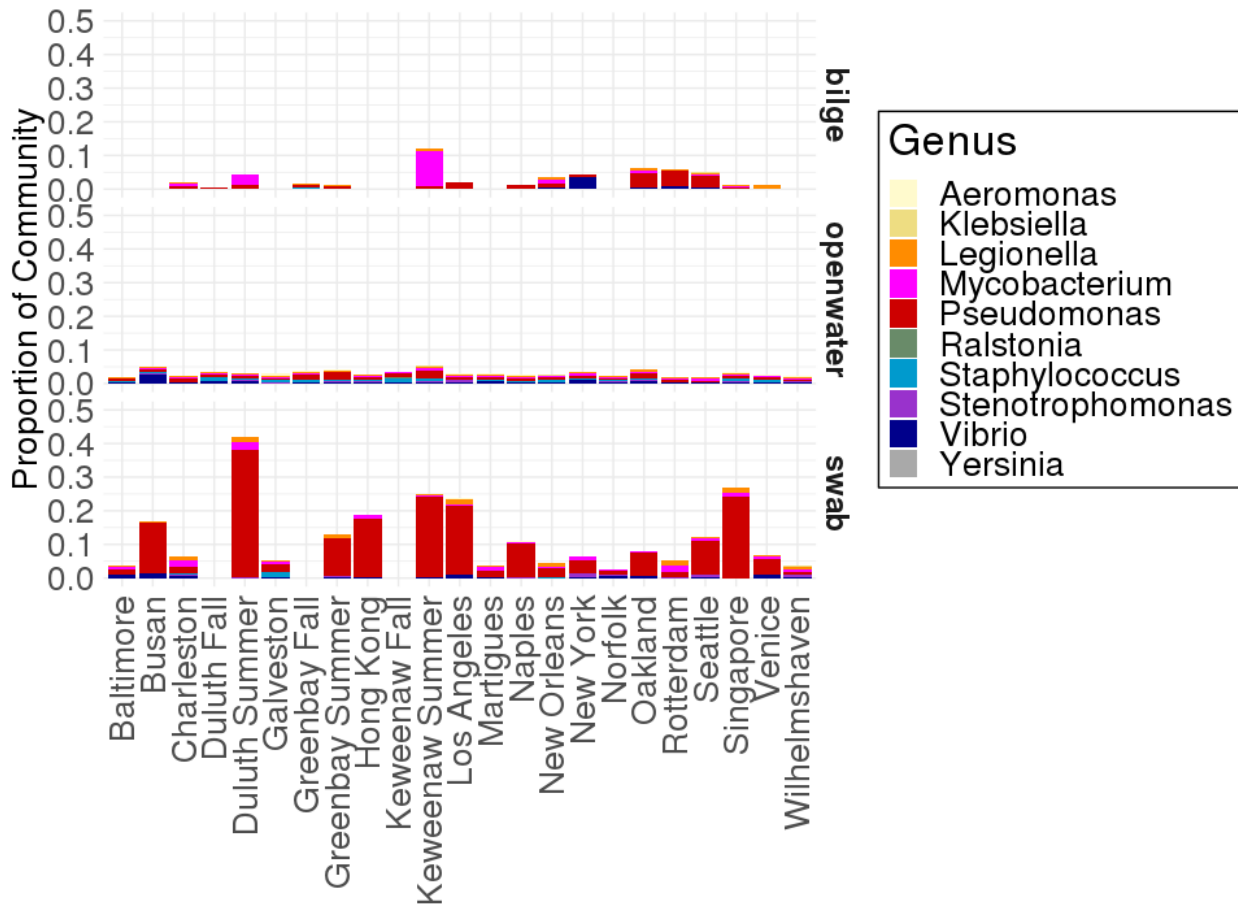

Figure S2 Abundance of genera associated with pathogens showing variance between sample types and location. Swab and bilge samples have higher abundances of these genera on average than the port water samples. Pseudomonas spp. are highly abundant across swab samples from most locations compared to the other sample types.



Table S9 Range of the relative abundance of genera closely associated with common water-borne pathogens found in each sample type. The abundances of these genera were highly variable between sample type and location.

| Family             | Genus            | Port Water  | Bilge       | Swab        |
|--------------------|------------------|-------------|-------------|-------------|
| Aeromonadaceae     | Aeromonas        | 0.003±0.019 | ---         | 0.002±0.002 |
| Burkholderiaceae   | Ralstonia        | 0.001       | ---         | ---         |
| Enterobacteriaceae | Klebsiella       | 0.003±0.002 | 0.001       | 0.002±0.001 |
| Legionellaceae     | Legionella       | 0.004±0.021 | 0.005±0.018 | 0.007±0.019 |
| Mycobacteriaceae   | Mycobacterium    | 0.004±0.021 | 0.017±0.081 | 0.008±0.033 |
| Pseudomonadaceae   | Pseudomonas      | 0.010±0.930 | 0.020±0.052 | 0.100±0.660 |
| Staphylococcaceae  | Staphylococcus   | 0.006±0.020 | 0.002±0.001 | 0.007±0.012 |
| Vibrionaceae       | Vibrio           | 0.008±0.277 | 0.010±0.027 | 0.005±0.018 |
| Xanthomonadaceae   | Stenotrophomonas | 0.003±0.008 | 0.001       | 0.004±0.006 |

Table S10 Variance of the average, minimum and maximum relative abundance of Cyanobacteria (phylum) found in each sample type. The presence of Cyanobacteria in the bilge compartment supports our hypothesis that the bacterial community on the boat is strongly influenced by the port water.

| Sample Type | Average | Minimum | Maximum |
|-------------|---------|---------|---------|
| Port water  | 0.126   | 0.011   | 0.762   |
| Bilge       | 0.081   | 0.010   | 0.678   |
| Swab        | 0.070   | 0.011   | 0.585   |

Table S11 ANOVA of the population of Cyanobacteria in each sample type shows a statistically significant difference between the alpha diversity of Cyanobacteria our different sample types. Significant p-values were given for both Shannon diversity and Observed ASVs.

| Diversity Metric | Degrees of Freedom | F-Value | P-value |
|------------------|--------------------|---------|---------|
| Shannon          | 2                  | 24.56   | < 0.001 |
| Observed         | 2                  | 51.31   | < 0.001 |

Table S12: Summary of p-values for Tukey HSD (post hoc) test results for the population of Cyanobacteria found in our samples. Both Observed ASVs (upper triangle) and Shannon diversity (lower triangle) showed statistically significant differences between the population of Cyanobacteria in each of our sample types.

|            | Port Water | Bilge   | Swab    |
|------------|------------|---------|---------|
| Port Water |            | < 0.001 | < 0.001 |
| Bilge      | < 0.001    |         | 0.0096  |
| Swab       | < 0.001    | 0.001   |         |

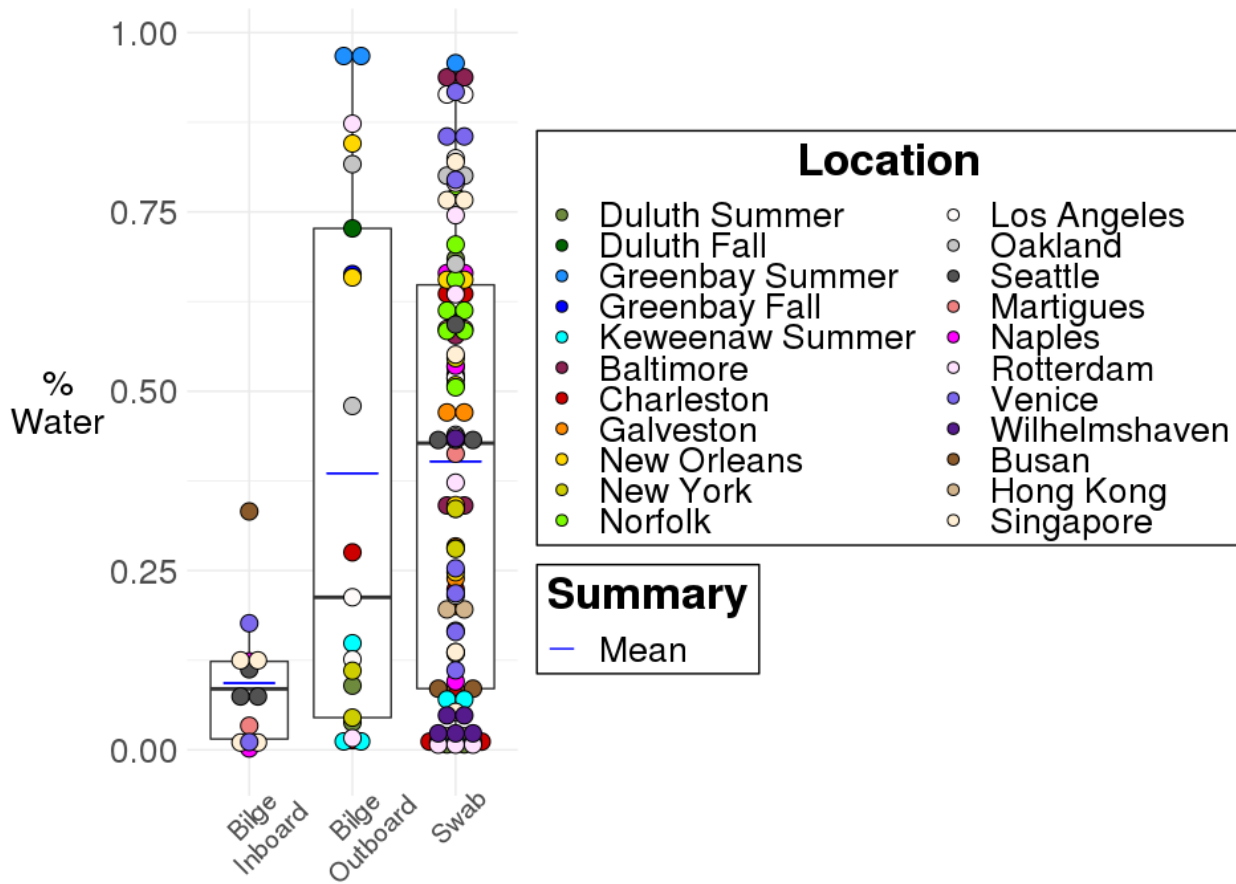

Figure S3 Summary of SourceTracker results showing the similarity of each boat sample to the port water. The bilge samples are divided into two categories to represent boats with inboard and outboard engines since the engine type may affect how much water leaks into the bilge compartment from the port.

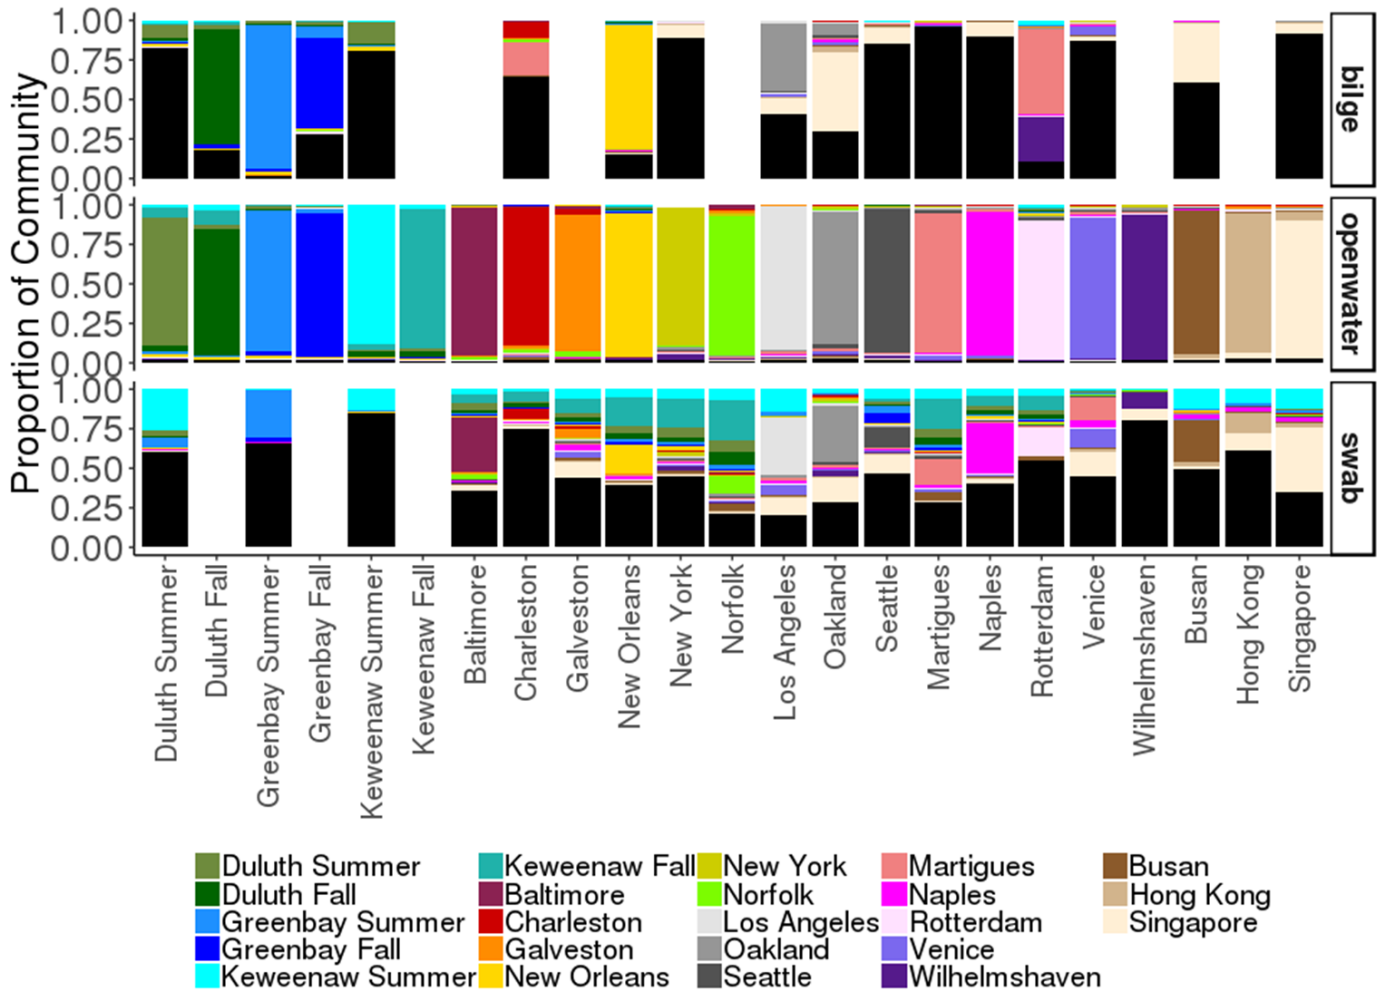

Figure S4 Proportions output by SourceTracker, separated by sample type, location and season (for Great Lakes samples). The proportion of the microbial community classified as the correct home port of the boat was highly variable for the boat samples (swab and bilge). We suggest that this is due to factors other than port water which also influence the bacterial community living on a boat.

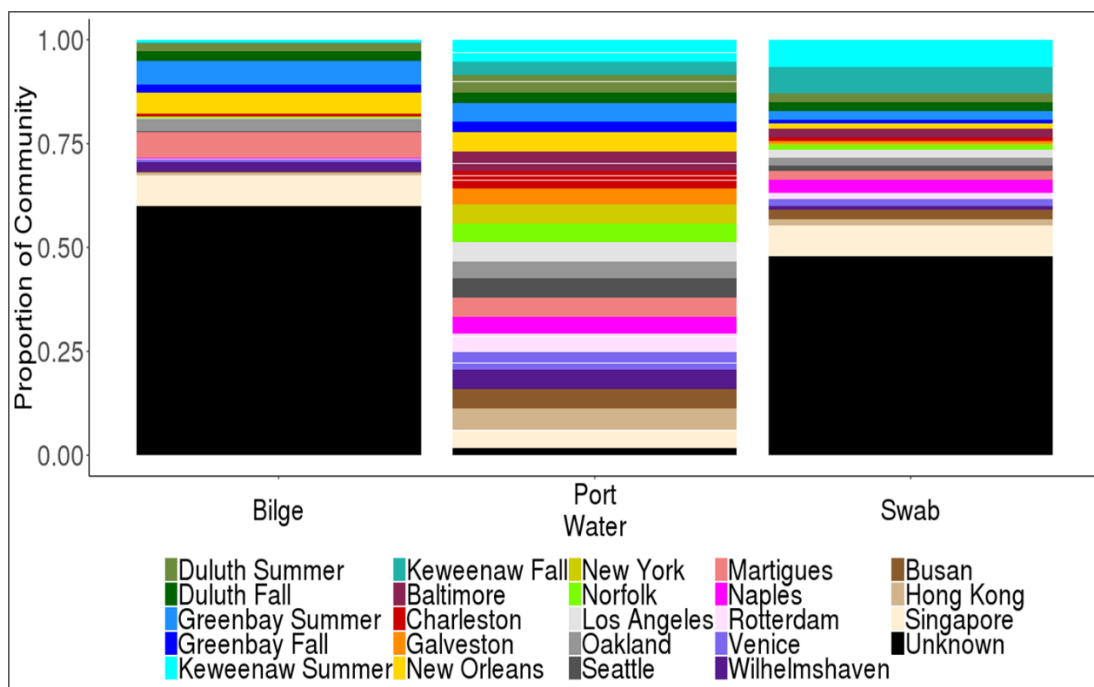

Figure S5 Average proportion of each sample type which was correctly classified as each location by SourceTracker. All of the colored part together represents how much of the microbial community (on average) is classified as water.

Table S13 Average SourceTracker proportions of each sample type described as water (sum of average proportion from each location).

|                    | Bilge | Port Water | Swab |
|--------------------|-------|------------|------|
| Percent Port Water | 40%   | 92%        | 52%  |
